# Supplementary material for: Hepatitis C Virus Non-Structural Protein 5A (NS5A) Disrupts Mitochondrial Dynamics and Induces Mitophagy
Source: PubMed Central journal article supplement (PMC6523690; doi:10.3390/cells8040290), 2019-03-29
Supplement: cells-08-00290-s001.pdf [file cells-08-00290-s001.pdf]

## Supplementary Material

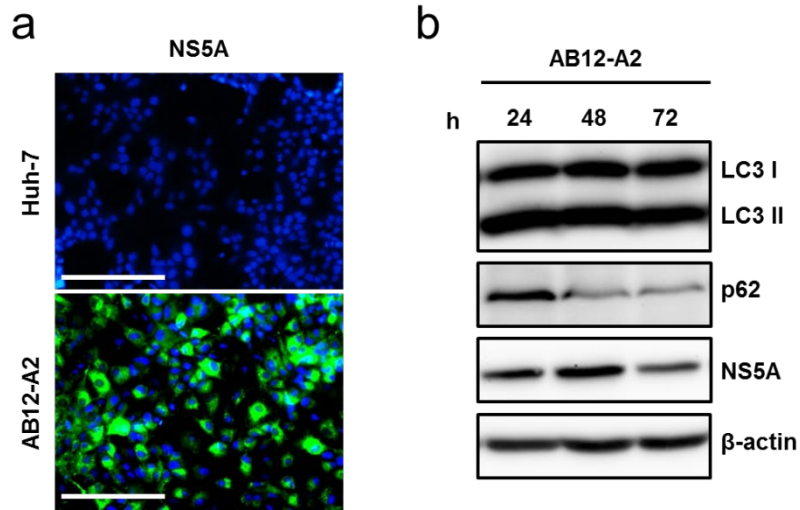

**Figure S1. AB12-A2 cells express NS5A and induce autophagic flux.** (a) HCV subgenomic replicon AB12-A2 cells were seeded in 24-well plates and stained with anti-NS5A antibody. The parental naïve Huh-7 cells were included as control and Hoechst stain was used to demarcate the nuclei. Magnification = 200X; scale bar = 200  $\mu$ m. (b) AB12-A2 replicon cells were seeded in 6-well plates for the indicated time-points. The lysates were subsequently harvested and subjected to Western blot analysis for the indicated proteins.

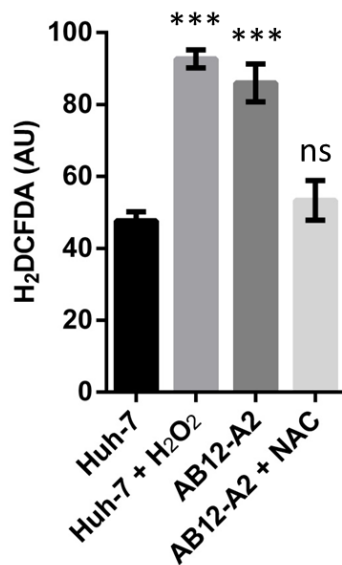

**Figure S2. AB12-A2 cells induce ROS production.** Huh-7 and the AB12-A2 replicon cells were seeded in 6-well plates followed by H<sub>2</sub>DCFDA staining and flow cytometry analysis for ROS production with procedures and treatments carried out as in Fig. 5a. NAC = 20 mM; H<sub>2</sub>O<sub>2</sub> = 1 mM. Asterisks (\*) denote statistical significance compared with control (Huh-7 only): \*\*\* $p < 0.001$ ; ns = not significant.
